# Supplementary material for: Spns2 Transporter Contributes to the Accumulation of S1P in Cystic Fibrosis Human Bronchial Epithelial Cells
Source: MDPI journal article supplement (doi:10.3390/biomedicines9091121), 2021-08-31
Supplement: s1 [file s1]

|               | S1P Figure 1A |            |            | Sph Figure 1B |            |            | SphK1 Figure 2A |            |            |
|---------------|---------------|------------|------------|---------------|------------|------------|-----------------|------------|------------|
|               | HBE           | IB3-1      | CFBE41o    | HBE           | IB3-1      | CFBE41o    | HBE             | IB3-1      | CFBE41o    |
| <u>Mean</u>   | 1,78365       | 3,78455433 | 5,66072867 | 200,442717    | 152,898887 | 143,275822 | 38,652728       | 77,089188  | 149,0778   |
| <u>SD</u>     | 1,47420496    | 1,68692197 | 2,22133909 | 74,8430775    | 58,6071464 | 84,5968856 | 3,87313547      | 23,8112406 | 73,6917612 |
| <u>Median</u> | 1,7835        | 3,826      | 5,6        | 196,52295     | 146,0496   | 103,79378  | 37,92709        | 73,2964    | 110,8648   |
| <u>Q1</u>     | 1,012025      | 2,73946525 | 5,0914355  | 135,655625    | 100,003095 | 86,21592   | 36,5898         | 64,907     | 106,60305  |
| <u>Q3</u>     | 2,555125      | 4,21452925 | 6,3983435  | 261,835       | 205,5225   | 177,6385   | 42,00993        | 82,19993   | 172,44605  |
| <u>IQR</u>    | 1,5431        | 1,475064   | 1,306908   | 126,179375    | 105,519405 | 91,42258   | 5,42013         | 17,29293   | 65,843     |
| n             | 4             | 6          | 6          | 6             | 6          | 6          | 5               | 5          | 3          |

  

|               | SphK2 Figure 2B |            |            | SGPL1 Figure 2C |            |            | Spns2 Figure 3A |            |            |
|---------------|-----------------|------------|------------|-----------------|------------|------------|-----------------|------------|------------|
|               | HBE             | IB3-1      | CFBE41o    | HBE             | IB3-1      | CFBE41o    | HBE             | IB3-1      | CFBE41o    |
| <u>Mean</u>   | 9,24516         | 10,81858   | 5,9365225  | 37,10802        | 15,66126   | 24,6485667 | 5,6699566       | 0,0108375  | 1,4368928  |
| <u>SD</u>     | 1,45022266      | 1,57319947 | 2,67483857 | 8,79111409      | 4,71109136 | 2,86236204 | 3,59757426      | 0,01347129 | 1,17994936 |
| <u>Median</u> | 9,3498          | 10,7528    | 5,0695     | 39,1172         | 15,905     | 24,4492    | 5,326801        | 0,00791054 | 1,3499     |
| <u>Q1</u>     | 9,2396          | 10,2459    | 4,09244    | 32,1379         | 12,5618    | 23,17015   | 3,2359          | 0,0026     | 0,8263737  |
| <u>Q3</u>     | 9,3988          | 11,4845    | 6,9135825  | 39,7976         | 17,1237    | 26,0273    | 7,406262        | 0,00794392 | 2,0039155  |
| <u>IQR</u>    | 0,1592          | 1,2386     | 2,8211425  | 7,6597          | 4,5619     | 2,85715    | 4,170362        | 0,00534392 | 1,1775418  |
| n             | 5               | 5          | 4          | 5               | 5          | 3          | 5               | 5          | 3          |

  

|               | Spns2 Figure 3B |            |            | SGPP1 Figure S1 |            |            | SGPP2 Figure S1 |            |            |
|---------------|-----------------|------------|------------|-----------------|------------|------------|-----------------|------------|------------|
|               | HBE             | IB3-1      | CFBE41o    | HBE             | IB3-1      | CFBE41o    | HBE             | IB3-1      | CFBE41o    |
| <u>Mean</u>   | 2,5611875       | 0,1920714  | 0,7968095  | 24,4697425      | 19,45721   | 64,9266567 | 3,221024        | 0,747748   | 33,5662767 |
| <u>SD</u>     | 1,07643985      | 0,16487704 | 1,09488904 | 7,16536317      | 5,45198168 | 31,3776577 | 1,87173617      | 1,33377981 | 24,4343283 |
| <u>Median</u> | 2,3964205       | 0,2502142  | 0,2104285  | 23,67921        | 18,3201    | 75,86288   | 3,82442         | 0,15954    | 32,15035   |
| <u>Q1</u>     | 1,87977575      | 0,1281071  | 0,16521425 | 21,54443        | 17,22154   | 52,703635  | 1,46897         | 0,14825    | 21,010525  |
| <u>Q3</u>     | 3,07783225      | 0,2851071  | 1,13521425 | 26,6045225      | 20,56104   | 82,61779   | 4,35684         | 0,16686    | 45,414065  |
| <u>IQR</u>    | 1,1980565       | 0,157      | 0,97       | 5,0600925       | 3,3395     | 29,914155  | 2,88787         | 0,01861    | 24,40354   |
| n             | 4               | 3          | 3          | 4               | 5          | 3          | 5               | 5          | 3          |

|               | S1P Figure 4A |          | Sph Figure 4B |          | SPHK1 Figure 5A |          | SPHK2 Figure 5B |         |
|---------------|---------------|----------|---------------|----------|-----------------|----------|-----------------|---------|
|               | BE            | CF-BE    | BE            | CF-BE    | BE              | CF-BE    | BE              | CF-BE   |
| <u>Mean</u>   | 33,88379      | 44,27338 | 879,685       | 492,1915 | 210,192         | 280,2045 | 2,19575         | 2,30575 |
| <u>SD</u>     | 10,04781      | 17,31776 | 381,1091      | 87,86609 | 119,095         | 92,26924 | 0,399814        | 0,61495 |
| <u>Median</u> | 35,39569      | 44,27554 | 872,0551      | 499,278  | 170,5665        | 286,675  | 2,2655          | 2,481   |
| <u>Q1</u>     | 28,58774      | 30,97387 | 738,1675      | 429,2645 | 142,0693        | 232,0355 | 2,062           | 2,066   |
| <u>Q3</u>     | 40,69174      | 57,57504 | 1013,573      | 562,205  | 238,6893        | 334,844  | 2,39925         | 2,72075 |
| <u>IQR</u>    | 12,104        | 26,60117 | 275,4051      | 132,9405 | 96,62           | 102,8085 | 0,33725         | 0,65475 |
| n             | 4             | 4        | 4             | 4        | 4               | 4        | 4               | 4       |

  

|               | SGPL1 Figure 5C |          | SPNS2 Figure 5D |          | SGPP1 Figure S4 |          | SGPP2 Figure S4 |          |
|---------------|-----------------|----------|-----------------|----------|-----------------|----------|-----------------|----------|
|               | BE              | CF-BE    | BE              | CF-BE    | BE              | CF-BE    | BE              | CF-BE    |
| <u>Mean</u>   | 17,05025        | 13,279   | 0,289           | 0,1615   | 28,85445        | 24,30733 | 5,340371        | 4,146111 |
| <u>SD</u>     | 5,201455        | 2,931284 | 0,351646        | 0,118632 | 8,960104        | 8,495972 | 7,140016        | 1,693533 |
| <u>Median</u> | 16,2445         | 12,644   | 0,155           | 0,1245   | 27,51598        | 21,25972 | 2,28463         | 4,504247 |
| <u>Q1</u>     | 12,93475        | 12,032   | 0,0695          | 0,1065   | 22,14028        | 19,03395 | 1,270432        | 3,292963 |
| <u>Q3</u>     | 20,36           | 13,891   | 0,3745          | 0,1795   | 34,23015        | 26,5331  | 6,354569        | 5,357395 |
| <u>IQR</u>    | 7,42525         | 1,859    | 0,305           | 0,073    | 12,08987        | 7,499154 | 5,084138        | 2,064432 |
| n             | 4               | 4        | 4               | 4        | 4               | 4        | 4               | 4        |
